# Supplementary material
Source: PubMed Central journal article supplement (PMC4950393)
Supplement: EBM619706Supplement.pdf [file EBM619706Supplement.pdf]

Fig. S1

**Calcium influx in the presence of high concentration of Ryanodine**

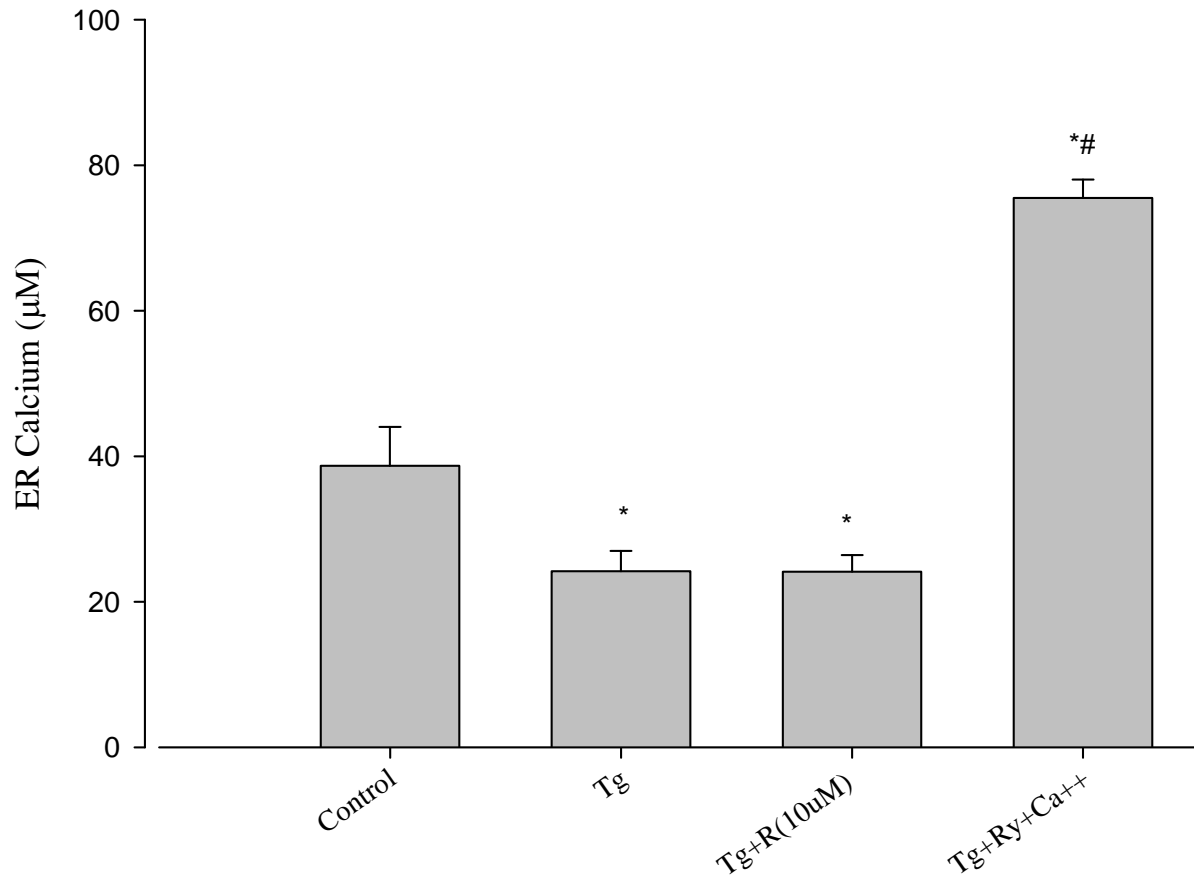

L6 cells were suspended in a calcium free buffer, Thapsigargin (4 µM) and Ryanodine (10 µM) were added to block Ca<sup>++</sup>ATPase and RyR1 channel respectively. At the end external calcium was added back and resultant change in the intraluminal calcium was measured. Increase in calcium was significant compared to control. \* Significant compared to control, # Significant compared to Tg+Ry+Ca<sup>++</sup> p < 0.05. Tg = Thapsigargin, Ry = Ryanodine
